# Supplementary material for: Contribution of Hsa-Mir-146A and Hsa-Mir-223 Gene Variations in Patients with Multiple Sclerosis Reveals Association of Rs2910164 and Rs1044165 with Risk of Multiple Sclerosis Susceptibility
Source: HighWire-hosted journal article supplement (doi:10.1136/jim-2020-001539), 2021-01-21
Supplement: jim-2020-001539supp001_data_supplement.pdf [file jim-2020-001539supp001_data_supplement.pdf]

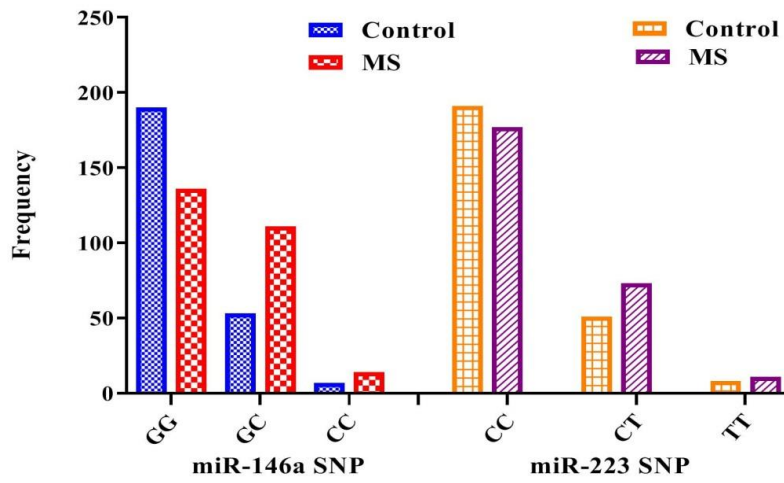

Figure S1. Genotype frequency of the current polymorphisms in healthy controls and MS patients.

**Table S1.** Genotype distribution for miR-146a and miR-223 between types of MS patients

|             | <b>miR-146a (rs2910164)</b> |           |           |                | <b>miR-223 (rs1044165)</b> |           |           |                |
|-------------|-----------------------------|-----------|-----------|----------------|----------------------------|-----------|-----------|----------------|
|             | <i>GG</i>                   | <i>GC</i> | <i>CC</i> | <i>P value</i> | <i>CC</i>                  | <i>CT</i> | <i>TT</i> | <i>P value</i> |
| <b>RRMS</b> | 120                         | 102       | 10        |                | 157                        | 65        | 10        |                |
| <b>SPMS</b> | 11                          | 7         | 3         | 0.59           | 14                         | 6         | 1         | 0.48           |
| <b>PPMS</b> | 5                           | 2         | 1         |                | 6                          | 2         | 0         |                |

**Table S2.** miR-146a and miR-223 genotypes distribution and gender in MS patients and gender matched controls

| Genotype                       |    | Health control        |                         | P value | MS patients          |                         | P value |
|--------------------------------|----|-----------------------|-------------------------|---------|----------------------|-------------------------|---------|
|                                |    | <b>Male<br/>n=108</b> | <b>Female<br/>n=142</b> |         | <b>Male<br/>n=75</b> | <b>Female<br/>n=186</b> |         |
| <b>miR-146a</b><br>(rs2910164) | GG | 81                    | 109                     | 0.98    | 40                   | 96                      | 0.96    |
|                                | GC | 22                    | 31                      |         | 31                   | 80                      |         |
|                                | CC | 3                     | 4                       |         | 4                    | 10                      |         |
| <b>miR-223</b><br>(rs1044165)  | CC | 88                    | 117                     | 0.99    | 53                   | 124                     | 0.821   |
|                                | CT | 14                    | 19                      |         | 19                   | 54                      |         |
|                                | TT | 5                     | 7                       |         | 3                    | 8                       |         |
